# Supplementary material for: Assessment of Growth, Yield, and Nutrient Uptake of Mediterranean Tomato Landraces in Response to Salinity Stress
Source: MDPI journal article supplement (doi:10.3390/plants12203551), 2023-10-12
Supplement: s1 [file s1]

**Table S1.** Standard errors of means (n=3) of the concentration of macro- (K, Na, Ca, Mg and K/Na) and micro- nutrients (Fe, Cu, Mn, Zn) in roots of different tomato landraces.

|                 |                            | Roots       |              |      |              |              |              |              |              |              |
|-----------------|----------------------------|-------------|--------------|------|--------------|--------------|--------------|--------------|--------------|--------------|
| Salinity Stress | Variety                    | K<br>(mg/g) | Na<br>(mg/g) | K/Na | Ca<br>(mg/g) | Mg<br>(mg/g) | Fe<br>(µg/g) | Cu<br>(µg/g) | Mn<br>(µg/g) | Zn<br>(µg/g) |
| Interraction    |                            |             |              |      |              |              |              |              |              |              |
| 0.5 mM NaCl     | Chondrokatsari             | 2.40        | 1.12         | 1.18 | 0.27         | 0.30         | 37.89        | 1.12         | 7.24         | 11.52        |
|                 | Valldemossa (de)           | 1.53        | 0.09         | 0.38 | 0.45         | 0.38         | 35.81        | 0.40         | 7.95         | 8.33         |
|                 | Areti                      | 3.93        | 0.66         | 0.29 | 0.23         | 0.07         | 28.56        | 0.77         | 3.05         | 4.54         |
|                 | ATS-048/06                 | 4.33        | 0.05         | 1.09 | 0.59         | 0.26         | 57.42        | 1.66         | 5.14         | 4.84         |
|                 | de Ramellet                | 2.33        | 0.37         | 0.19 | 0.35         | 0.33         | 25.16        | 0.64         | 9.17         | 2.78         |
|                 | Moneymaker                 | 2.03        | 0.61         | 0.77 | 0.51         | 0.19         | 35.26        | 0.16         | 3.17         | 9.17         |
|                 | Cherry-INRAE (2)           | 1.15        | 0.30         | 0.67 | 0.39         | 0.27         | 41.34        | 1.32         | 4.97         | 5.91         |
|                 | Seccagno PSC1-1            | 2.73        | 0.96         | 4.07 | 0.17         | 0.24         | 42.31        | 1.80         | 2.68         | 10.53        |
|                 | tomataki                   | 0.58        | 0.91         | 2.35 | 0.49         | 0.16         | 33.89        | 1.83         | 8.24         | 12.10        |
|                 | CC_1791 Allungato a Fiasco | 3.21        | 0.35         | 1.04 | 0.37         | 0.20         | 14.78        | 0.59         | 7.84         | 6.82         |
|                 | CC_1665 Pollena            | 3.53        | 0.33         | 4.02 | 0.34         | 0.21         | 40.20        | 1.29         | 2.36         | 6.85         |
|                 | GR-451/04                  | 0.87        | 0.66         | 1.22 | 0.85         | 0.08         | 45.60        | 0.27         | 7.07         | 6.38         |
|                 | Corbarino                  | 3.79        | 0.50         | 1.39 | 0.48         | 0.13         | 69.47        | 0.75         | 6.05         | 8.46         |
|                 | Cherry-INRAE (1)           | 1.45        | 0.10         | 1.98 | 0.88         | 0.25         | 66.94        | 1.21         | 5.25         | 3.10         |
|                 | Cherry-INRAE (3)           | 2.91        | 0.17         | 2.12 | 0.12         | 0.13         | 40.64        | 0.92         | 6.68         | 6.76         |

|            |                                   |      |      |      |      |      |       |      |       |       |
|------------|-----------------------------------|------|------|------|------|------|-------|------|-------|-------|
| 30 mM NaCl | <b>Cherry-INRAE (4)</b>           | 3.79 | 0.69 | 2.11 | 0.74 | 0.22 | 25.99 | 0.87 | 3.48  | 6.26  |
|            | <b>Chondrokatsari</b>             | 2.60 | 1.76 | 0.38 | 0.13 | 0.17 | 16.71 | 1.93 | 3.45  | 8.45  |
|            | <b>Valldemossa (de)</b>           | 1.33 | 2.29 | 0.34 | 0.77 | 0.10 | 58.17 | 0.65 | 6.67  | 1.94  |
|            | <b>Areti</b>                      | 1.20 | 1.04 | 0.21 | 0.17 | 0.01 | 26.09 | 1.05 | 1.61  | 6.00  |
|            | <b>ATS-048/06</b>                 | 2.33 | 0.58 | 0.18 | 0.18 | 0.14 | 24.14 | 1.42 | 5.87  | 1.60  |
|            | <b>de Ramellet</b>                | 3.48 | 2.77 | 0.64 | 0.70 | 0.22 | 14.83 | 1.22 | 5.59  | 9.85  |
|            | <b>Moneymaker</b>                 | 2.03 | 1.88 | 0.15 | 0.26 | 0.12 | 12.92 | 2.42 | 3.10  | 6.87  |
|            | <b>Cherry-INRAE (2)</b>           | 1.44 | 1.88 | 0.42 | 0.17 | 0.07 | 26.85 | 0.62 | 4.05  | 13.52 |
|            | <b>Seccagno PSC1-1</b>            | 2.52 | 1.61 | 0.48 | 0.11 | 0.04 | 32.60 | 0.87 | 6.44  | 3.79  |
|            | <b>tomataki</b>                   | 0.00 | 0.43 | 0.08 | 0.44 | 0.07 | 20.01 | 0.63 | 9.23  | 11.32 |
|            | <b>CC_1791 Allungato a Fiasco</b> | 1.45 | 3.56 | 0.39 | 0.50 | 0.16 | 20.59 | 1.10 | 1.70  | 10.59 |
|            | <b>CC_1665 Pollena</b>            | 0.88 | 0.17 | 0.23 | 0.71 | 0.17 | 52.90 | 1.39 | 4.95  | 9.80  |
|            | <b>GR-451/04</b>                  | 1.53 | 2.50 | 0.41 | 1.02 | 0.38 | 42.11 | 1.20 | 3.01  | 7.85  |
|            | <b>Corbarino</b>                  | 3.46 | 2.74 | 0.18 | 0.99 | 0.11 | 18.66 | 1.50 | 10.66 | 7.93  |
|            | <b>Cherry-INRAE (1)</b>           | 3.21 | 1.17 | 0.23 | 0.29 | 0.18 | 16.88 | 1.11 | 8.30  | 9.80  |
|            | <b>Cherry-INRAE (3)</b>           | 1.76 | 0.60 | 0.24 | 0.38 | 0.15 | 21.04 | 1.06 | 9.81  | 9.61  |
|            | <b>Cherry-INRAE (4)</b>           | 2.00 | 0.33 | 0.65 | 0.33 | 0.25 | 14.76 | 0.57 | 5.16  | 5.04  |

**Table S2.** Standard errors of means (n =3) of the concentration of macro- (K, Na, Ca, Mg and K/Na) and micro- nutrients (Fe, Cu, Mn, Zn) in leaves of different tomato landraces.

|                 |                            | Leaves |        |       |        |        |        |        |        |        |
|-----------------|----------------------------|--------|--------|-------|--------|--------|--------|--------|--------|--------|
|                 |                            | K      | Na     |       | Ca     | Mg     | Fe     | Cu     | Mn     | Zn     |
| Salinity Stress | Variety                    | (mg/g) | (mg/g) | K/Na  | (mg/g) | (mg/g) | (µg/g) | (µg/g) | (µg/g) | (µg/g) |
| Interraction    |                            |        |        |       |        |        |        |        |        |        |
| 0.5 mM NaCl     | Chondrokatsari             | 9.13   | 0.11   | 6.54  | 3.77   | 1.20   | 4.16   | 1.53   | 10.74  | 6.17   |
|                 | Valldemossa (de)           | 6.39   | 0.32   | 5.84  | 2.66   | 0.76   | 0.83   | 0.90   | 12.15  | 4.57   |
|                 | Areti                      | 1.86   | 0.12   | 1.18  | 3.81   | 0.77   | 2.51   | 1.01   | 5.68   | 4.43   |
|                 | ATS-048/06                 | 1.53   | 0.33   | 0.96  | 1.26   | 0.74   | 5.89   | 0.51   | 12.39  | 7.19   |
|                 | de Ramellet                | 1.00   | 0.05   | 0.36  | 1.53   | 0.51   | 0.59   | 0.77   | 9.25   | 3.89   |
|                 | Moneymaker                 | 5.81   | 0.10   | 3.20  | 8.42   | 0.91   | 3.96   | 0.09   | 16.81  | 3.21   |
|                 | Cherry-INRAE (2)           | 5.51   | 0.19   | 4.95  | 2.76   | 0.37   | 3.85   | 1.20   | 3.25   | 12.54  |
|                 | Seccagno PSC1-1            | 3.28   | 0.18   | 15.69 | 3.23   | 1.13   | 0.74   | 0.72   | 30.03  | 6.55   |
|                 | tomataki                   | 3.21   | 0.06   | 2.12  | 1.33   | 0.58   | 4.63   | 1.35   | 13.46  | 5.60   |
|                 | CC_1791 Allungato a Fiasco | 1.00   | 0.08   | 3.07  | 3.54   | 0.59   | 0.99   | 1.44   | 13.37  | 5.71   |
|                 | CC_1665 Pollena            | 2.73   | 0.08   | 11.92 | 1.53   | 0.04   | 3.73   | 0.83   | 14.44  | 2.65   |
|                 | GR-451/04                  | 6.08   | 0.20   | 17.86 | 2.98   | 0.94   | 3.95   | 0.47   | 11.49  | 3.14   |
|                 | Corbarino                  | 1.33   | 0.32   | 14.74 | 2.09   | 0.80   | 2.45   | 1.33   | 18.31  | 2.72   |
|                 | Cherry-INRAE (1)           | 2.60   | 0.07   | 9.23  | 5.55   | 1.29   | 4.27   | 6.72   | 33.55  | 5.51   |
|                 | Cherry-INRAE (3)           | 4.26   | 0.10   | 10.83 | 1.67   | 0.61   | 3.06   | 0.33   | 7.07   | 3.03   |
|                 | Cherry-INRAE (4)           | 1.67   | 0.06   | 9.26  | 3.63   | 0.74   | 3.63   | 1.02   | 16.86  | 5.33   |

|            |                                   |      |      |      |      |      |      |      |       |      |
|------------|-----------------------------------|------|------|------|------|------|------|------|-------|------|
| 30 mM NaCl | <b>Chondrokatsari</b>             | 6.44 | 2.17 | 0.60 | 2.72 | 0.24 | 5.44 | 1.68 | 27.68 | 6.01 |
|            | <b>Valldemossa (de)</b>           | 0.88 | 0.88 | 0.60 | 6.09 | 1.38 | 3.83 | 1.25 | 11.00 | 1.62 |
|            | <b>Areti</b>                      | 1.00 | 0.29 | 0.23 | 3.20 | 0.49 | 3.60 | 1.82 | 38.40 | 4.55 |
|            | <b>ATS-048/06</b>                 | 1.45 | 0.76 | 0.26 | 1.89 | 0.17 | 2.49 | 1.10 | 11.72 | 5.00 |
|            | <b>de Ramellet</b>                | 3.84 | 1.01 | 0.52 | 4.07 | 1.61 | 5.47 | 0.42 | 20.53 | 2.92 |
|            | <b>Moneymaker</b>                 | 5.04 | 1.42 | 0.33 | 3.81 | 0.88 | 7.13 | 0.85 | 45.67 | 4.83 |
|            | <b>Cherry-INRAE (2)</b>           | 1.33 | 1.20 | 1.35 | 4.20 | 1.73 | 4.33 | 1.76 | 17.53 | 4.85 |
|            | <b>Seccagno PSC1-1</b>            | 4.81 | 0.60 | 0.62 | 0.52 | 1.06 | 5.27 | 0.78 | 35.50 | 9.65 |
|            | <b>tomataki</b>                   | 2.03 | 1.36 | 0.15 | 6.48 | 0.48 | 1.73 | 0.83 | 32.16 | 0.24 |
|            | <b>CC_1791 Allungato a Fiasco</b> | 3.53 | 0.60 | 0.53 | 0.72 | 1.23 | 4.89 | 0.24 | 28.11 | 7.81 |
|            | <b>CC_1665 Pollena</b>            | 3.06 | 0.17 | 1.00 | 2.23 | 0.39 | 3.35 | 0.56 | 7.06  | 6.66 |
|            | <b>GR-451/04</b>                  | 2.89 | 0.07 | 1.00 | 1.82 | 0.54 | 4.30 | 0.76 | 23.99 | 1.82 |
|            | <b>Corbarino</b>                  | 1.53 | 0.88 | 0.76 | 2.91 | 1.53 | 4.92 | 0.67 | 18.11 | 3.74 |
|            | <b>Cherry-INRAE (1)</b>           | 6.01 | 0.76 | 0.28 | 3.67 | 0.54 | 7.87 | 2.42 | 12.49 | 3.56 |
|            | <b>Cherry-INRAE (3)</b>           | 1.45 | 0.03 | 0.59 | 3.13 | 0.30 | 2.47 | 0.16 | 13.01 | 2.09 |
|            | <b>Cherry-INRAE (4)</b>           | 1.00 | 0.17 | 0.87 | 4.02 | 1.10 | 3.36 | 0.89 | 7.85  | 4.51 |

**Table S3.** Standard errors of means (n =3) of the concentration of macro- (K, Na, Ca, Mg and K/Na) and micro- nutrients (Fe, Cu, Mn, Zn) in fruit of different tomato landraces.

|                  |                            | Fruit       |              |       |              |              |              |              |              |              |
|------------------|----------------------------|-------------|--------------|-------|--------------|--------------|--------------|--------------|--------------|--------------|
| Salinity Stress  | Variety                    | K<br>(mg/g) | Na<br>(mg/g) | K/Na  | Ca<br>(mg/g) | Mg<br>(mg/g) | Fe<br>(µg/g) | Cu<br>(µg/g) | Mn<br>(µg/g) | Zn<br>(µg/g) |
| Interraction     |                            |             |              |       |              |              |              |              |              |              |
| 0.5 mM NaCl      | Chondrokatsari             | 0.65        | 0.07         | 10.94 | 0.02         | 0.07         | 3.24         | 0.34         | 0.20         | 0.99         |
|                  | Valldemossa (de)           | 2.12        | 0.12         | 6.14  | 0.00         | 0.09         | 5.39         | 0.18         | 0.86         | 0.99         |
|                  | Areti                      | 1.08        | 0.03         | 5.91  | 0.02         | 0.08         | 4.71         | 0.43         | 0.36         | 0.60         |
|                  | ATS-048/06                 | 0.63        | 0.05         | 5.36  | 0.01         | 0.06         | 1.80         | 0.11         | 0.55         | 0.88         |
|                  | de Ramellet                | 1.31        | 0.04         | 3.33  | 0.00         | 0.07         | 6.61         | 0.73         | 0.72         | 2.95         |
|                  | Moneymaker                 | 2.08        | 0.05         | 6.78  | 0.00         | 0.08         | 1.57         | 0.47         | 0.32         | 1.05         |
|                  | Cherry-INRAE (2)           | 0.82        | 0.07         | 7.84  | 0.01         | 0.08         | 3.33         | 0.25         | 1.39         | 0.91         |
|                  | Seccagno PSC1-1            | 1.39        | 0.03         | 3.26  | 0.04         | 0.06         | 2.90         | 0.43         | 0.28         | 0.98         |
|                  | tomataki                   | 2.14        | 0.03         | 1.66  | 0.02         | 0.06         | 1.25         | 0.53         | 0.65         | 1.10         |
|                  | CC_1791 Allungato a Fiasco | 0.75        | 0.01         | 1.03  | 0.00         | 0.05         | 1.73         | 0.34         | 0.49         | 0.84         |
|                  | CC_1665 Pollena            | 1.78        | 0.07         | 12.36 | 0.01         | 0.07         | 3.07         | 0.74         | 0.41         | 0.91         |
|                  | GR-451/04                  | 1.03        | 0.04         | 9.26  | 0.02         | 0.06         | 5.14         | 0.40         | 0.91         | 1.35         |
|                  | Corbarino                  | 1.25        | 0.05         | 12.27 | 0.00         | 0.06         | 3.57         | 0.54         | 0.28         | 0.41         |
|                  | Cherry-INRAE (1)           | 0.95        | 0.03         | 7.99  | 0.02         | 0.09         | 1.47         | 0.33         | 0.31         | 0.80         |
|                  | Cherry-INRAE (3)           | 0.75        | 0.17         | 15.90 | 0.02         | 0.03         | 1.21         | 0.60         | 0.35         | 1.72         |
| Cherry-INRAE (4) | 1.20                       | 0.04        | 9.55         | 0.02  | 0.09         | 3.14         | 0.54         | 0.50         | 0.64         |              |

|            |                                   |      |      |       |      |      |      |      |      |      |
|------------|-----------------------------------|------|------|-------|------|------|------|------|------|------|
| 30 mM NaCl | <b>Chondrokatsari</b>             | 1.31 | 0.13 | 1.29  | 0.02 | 0.06 | 7.44 | 0.62 | 0.48 | 1.36 |
|            | <b>Valldemossa (de)</b>           | 0.41 | 0.11 | 2.59  | 0.00 | 0.02 | 2.55 | 0.37 | 0.53 | 1.73 |
|            | <b>Areti</b>                      | 0.85 | 0.11 | 2.72  | 0.01 | 0.07 | 2.66 | 0.19 | 0.55 | 0.94 |
|            | <b>ATS-048/06</b>                 | 2.61 | 0.11 | 2.65  | 0.02 | 0.10 | 3.45 | 0.43 | 0.64 | 1.37 |
|            | <b>de Ramellet</b>                | 0.75 | 0.10 | 2.37  | 0.00 | 0.03 | 6.17 | 0.49 | 0.54 | 1.94 |
|            | <b>Moneymaker</b>                 | 1.44 | 0.13 | 2.12  | 0.00 | 0.06 | 0.86 | 0.69 | 0.67 | 1.35 |
|            | <b>Cherry-INRAE (2)</b>           | 2.89 | 0.09 | 1.10  | 0.01 | 0.05 | 2.28 | 0.51 | 0.62 | 1.08 |
|            | <b>Seccagno PSC1-1</b>            | 1.60 | 0.09 | 1.79  | 0.01 | 0.05 | 2.84 | 0.32 | 0.27 | 1.31 |
|            | <b>tomataki</b>                   | 1.35 | 0.07 | 0.92  | 0.01 | 0.04 | 3.85 | 0.24 | 0.51 | 1.08 |
|            | <b>CC_1791 Allungato a Fiasco</b> | 0.71 | 0.10 | 4.00  | 0.03 | 0.04 | 1.95 | 0.33 | 0.39 | 0.74 |
|            | <b>CC_1665 Pollena</b>            | 0.71 | 0.02 | 1.51  | 0.00 | 0.03 | 1.20 | 0.47 | 0.13 | 0.21 |
|            | <b>GR-451/04</b>                  | 1.80 | 0.22 | 10.02 | 0.02 | 0.05 | 1.95 | 0.47 | 0.39 | 0.94 |
|            | <b>Corbarino</b>                  | 0.75 | 0.09 | 6.58  | 0.02 | 0.04 | 3.34 | 0.51 | 0.36 | 0.99 |
|            | <b>Cherry-INRAE (1)</b>           | 0.95 | 0.03 | 2.17  | 0.01 | 0.02 | 2.52 | 0.19 | 0.24 | 0.63 |
|            | <b>Cherry-INRAE (3)</b>           | 0.41 | 0.04 | 1.18  | 0.02 | 0.03 | 1.97 | 0.26 | 0.31 | 0.16 |
|            | <b>Cherry-INRAE (4)</b>           | 1.20 | 0.04 | 3.10  | 0.01 | 0.04 | 1.85 | 0.31 | 0.37 | 0.28 |
